# Supplementary material
Source: HighWire-hosted journal article supplement (https://www.life-science-alliance.org/content/2/4/e201900425/F12)

# Full unedited gel for Figure 3C

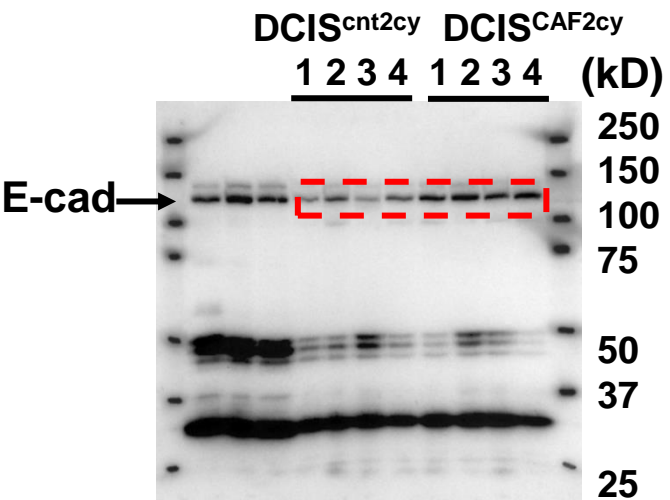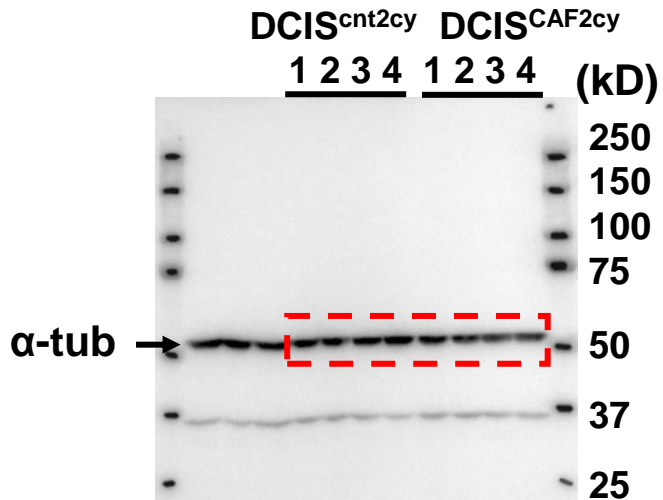

# Full unedited gel for Figure 3D

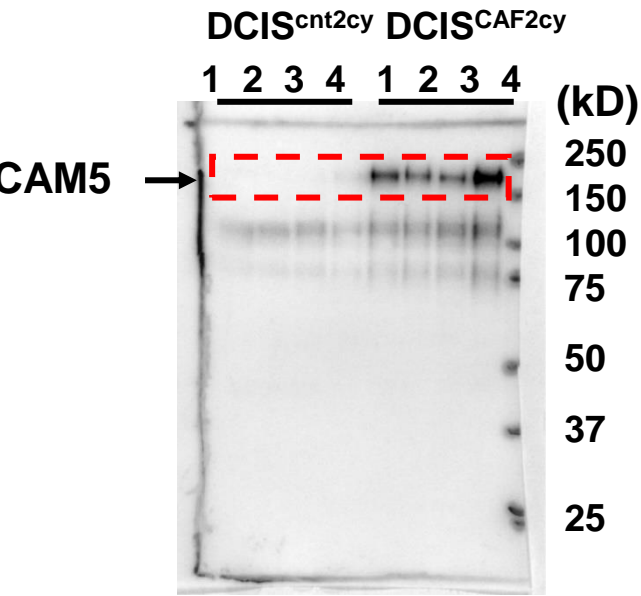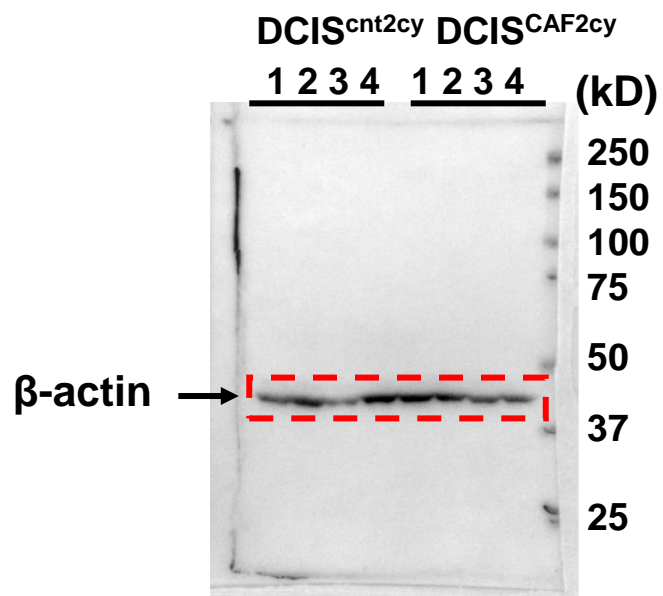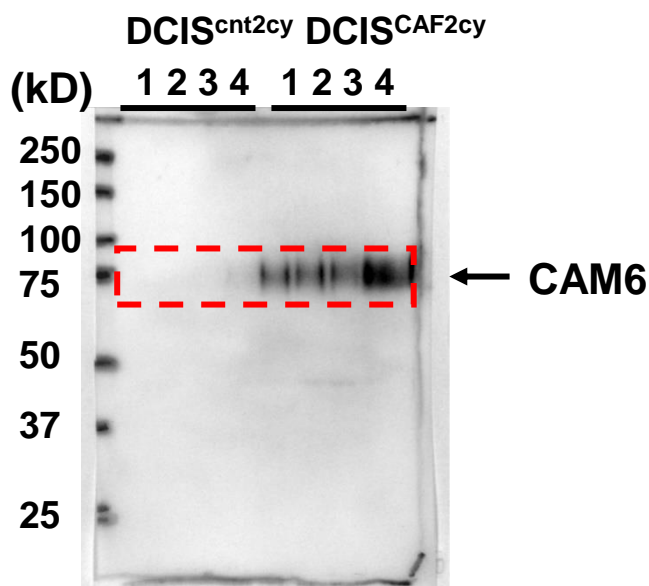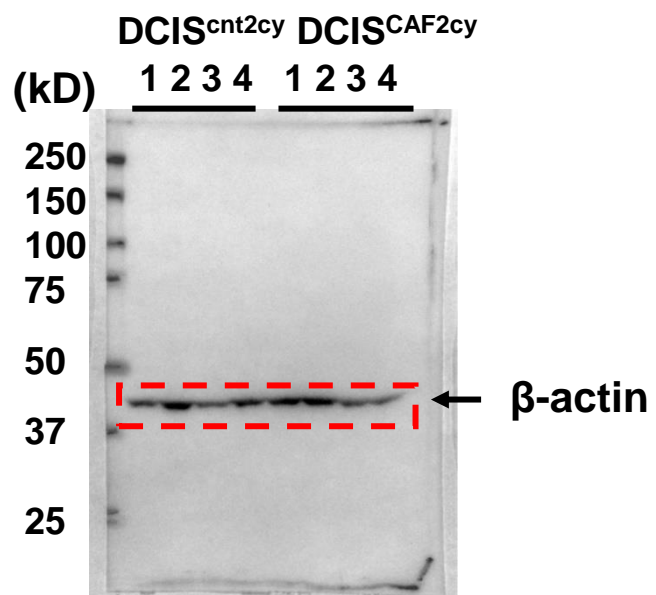

# Full unedited gel for Figure 3E

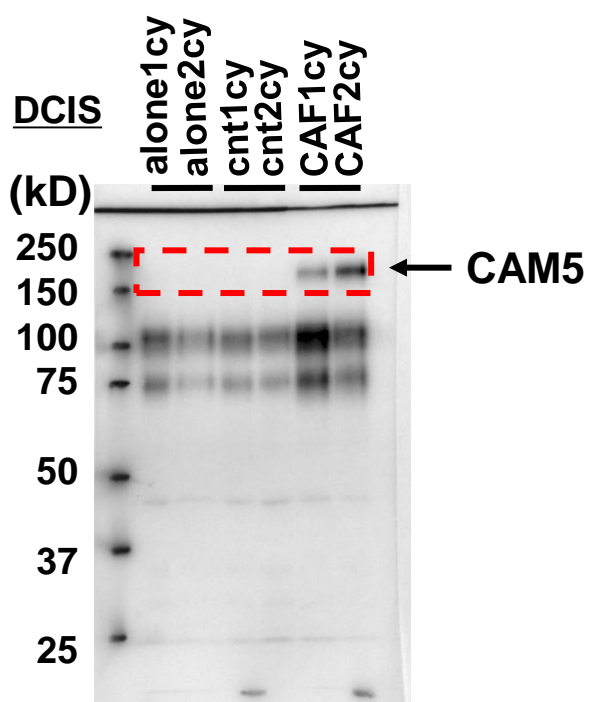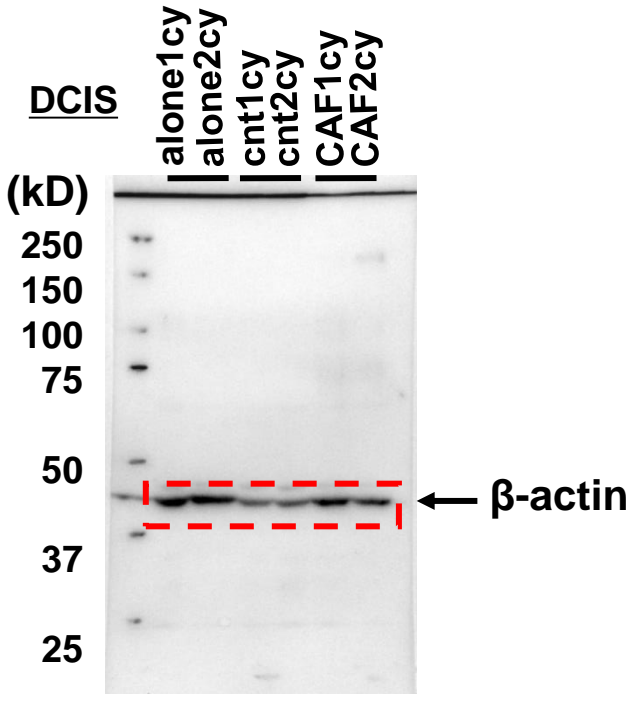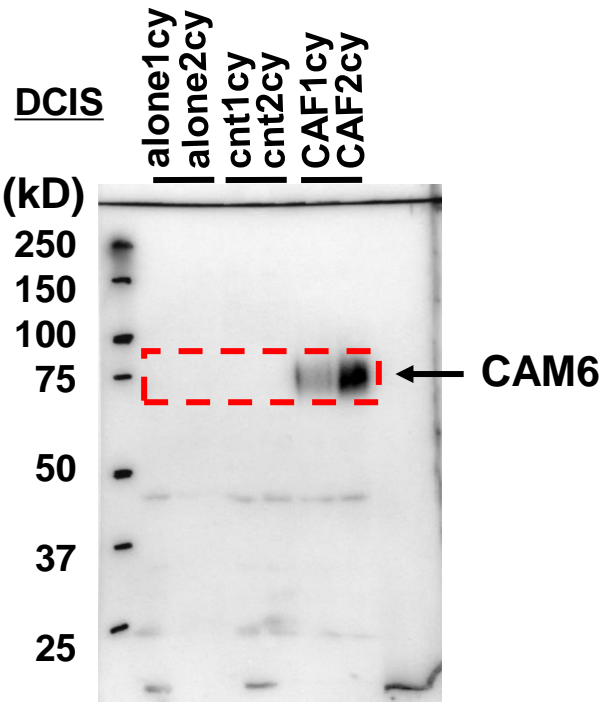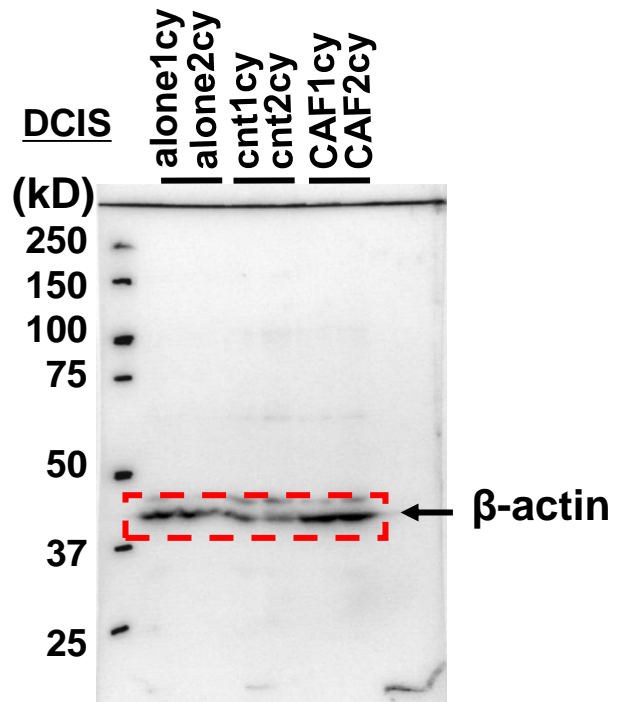

Full unedited gel for Figure 3H (top)

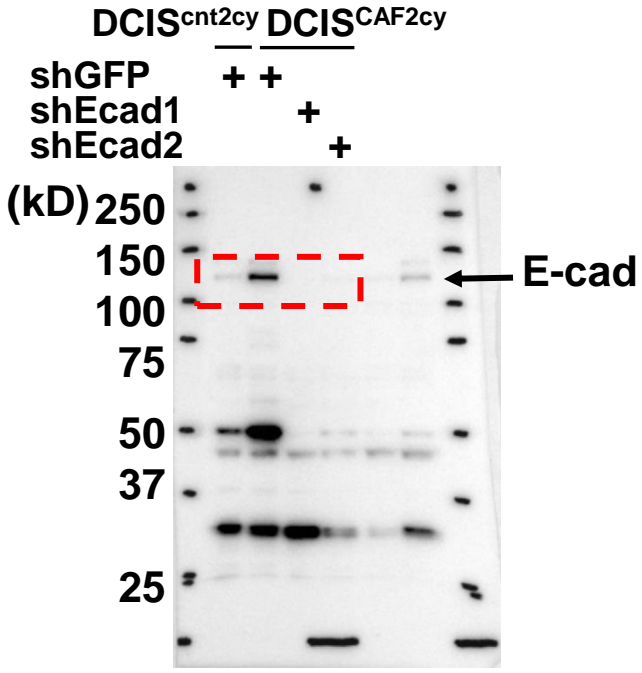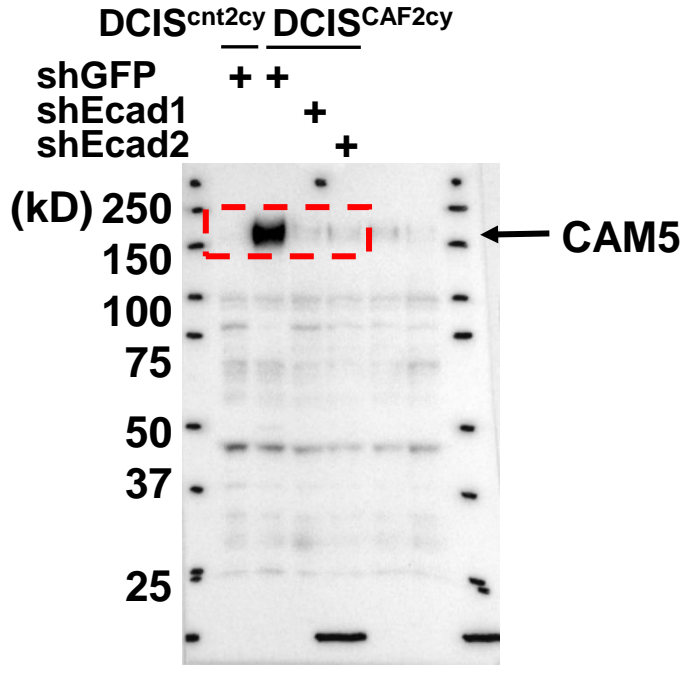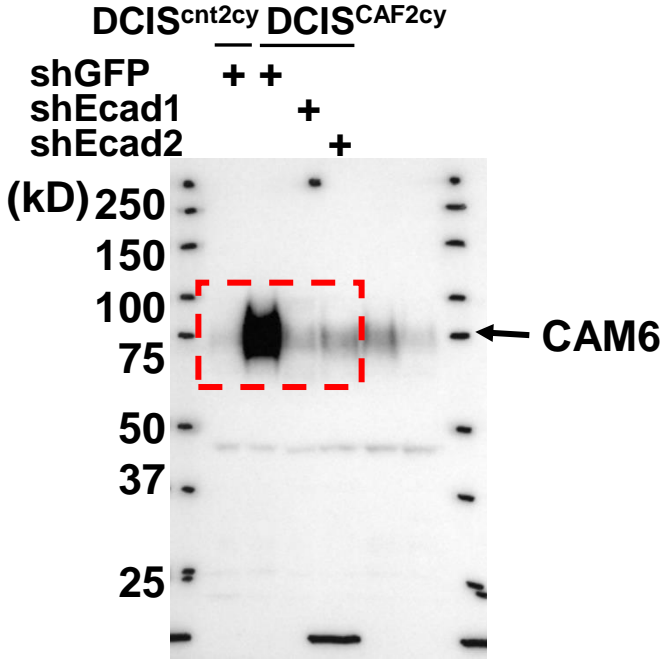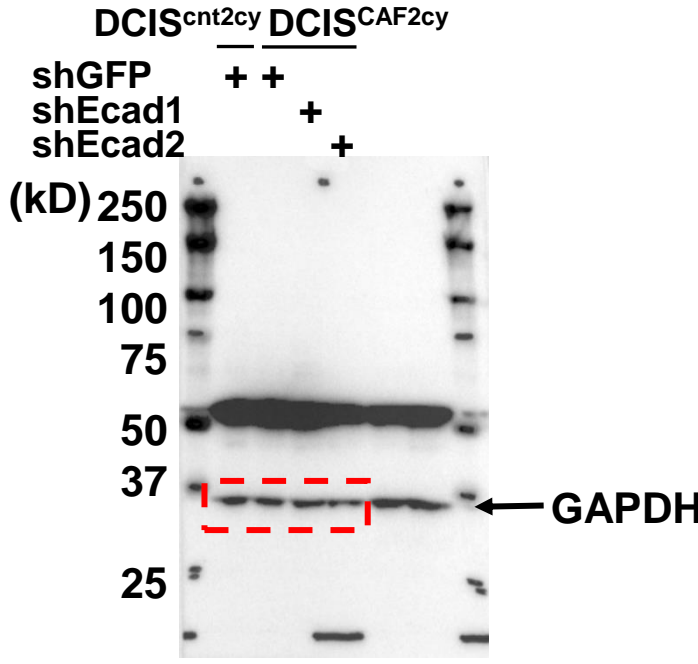

# Full unedited gel for Figure 3H (down)

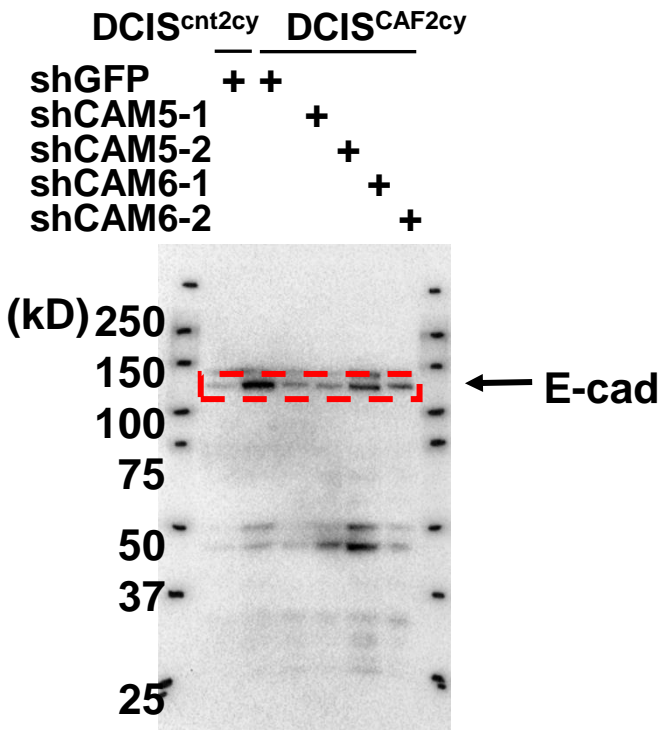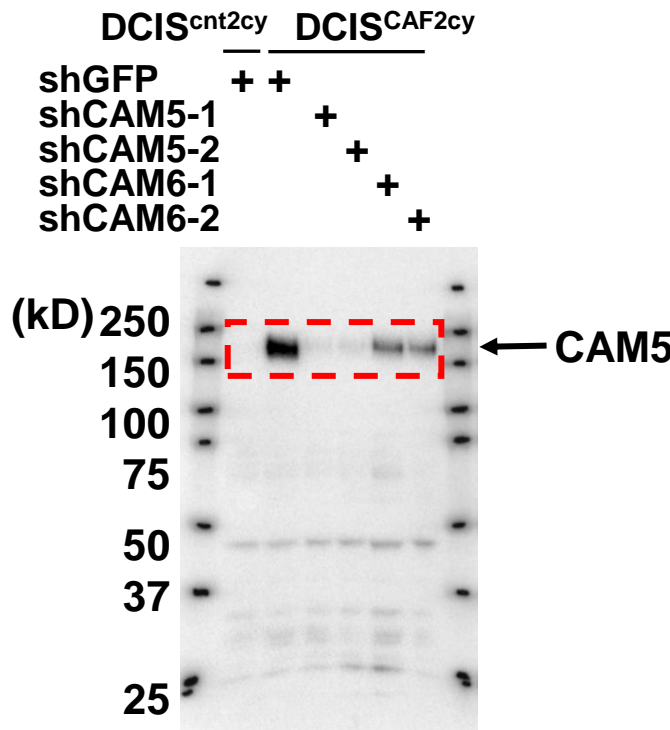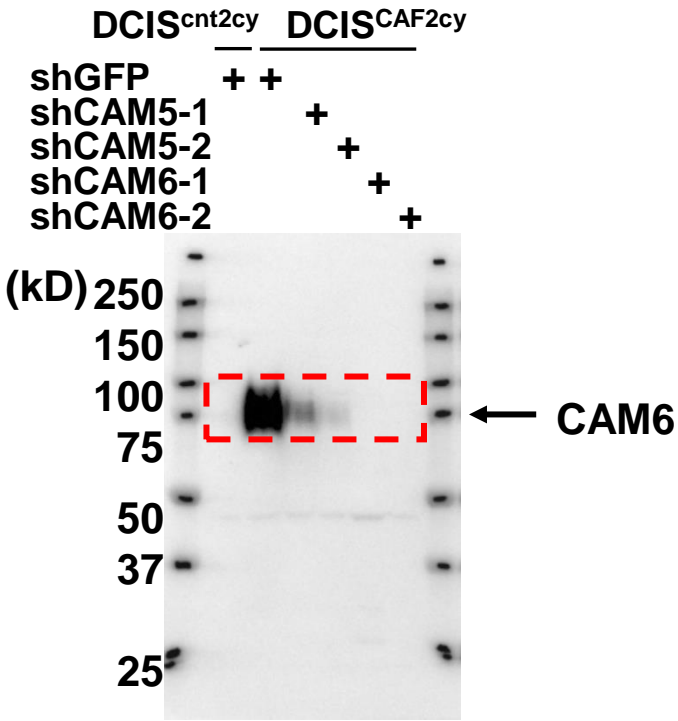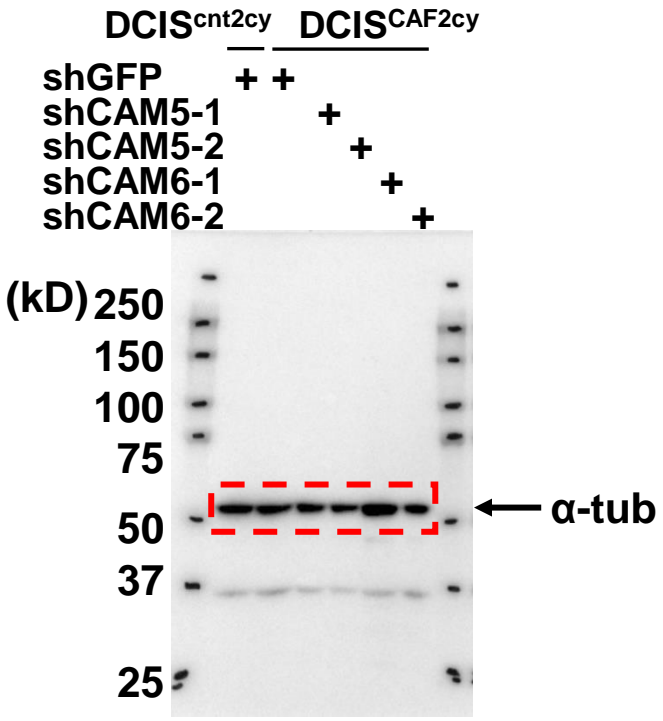

# Full unedited gel for Figure 5A

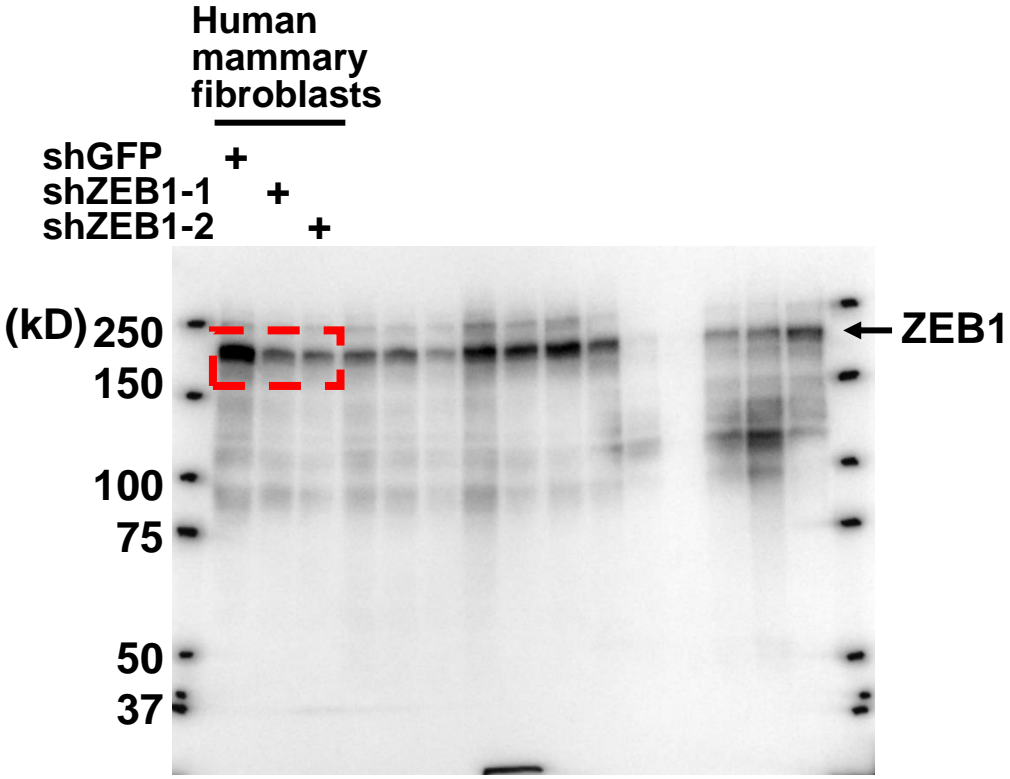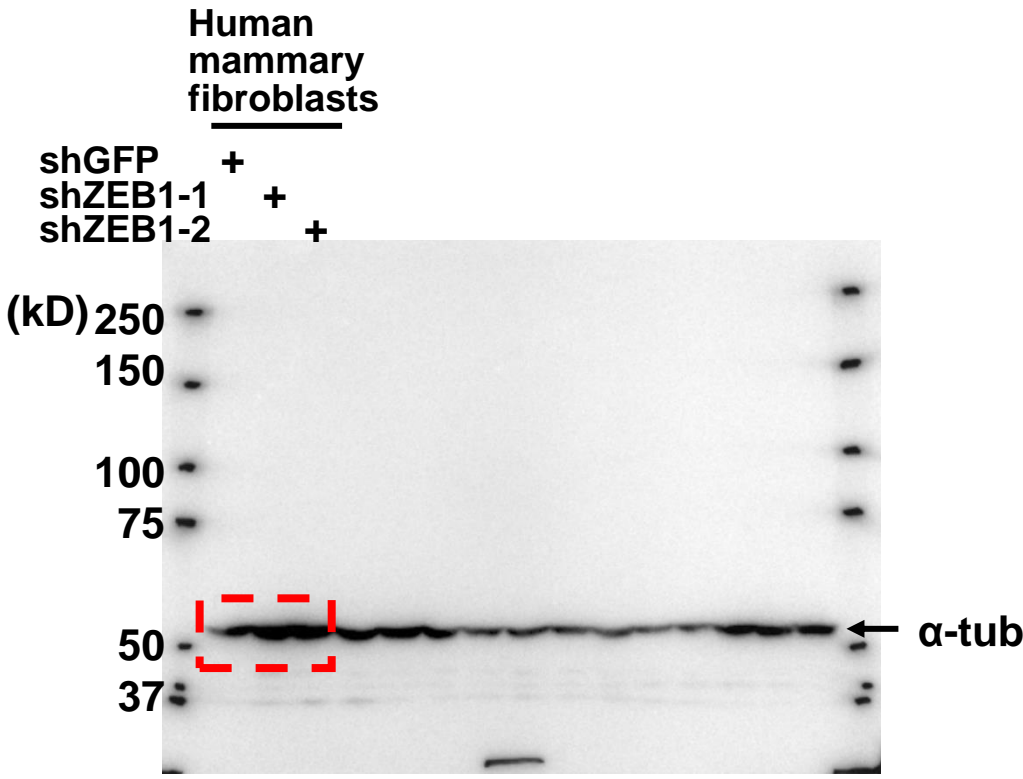

# Full unedited gel for Figure 6A

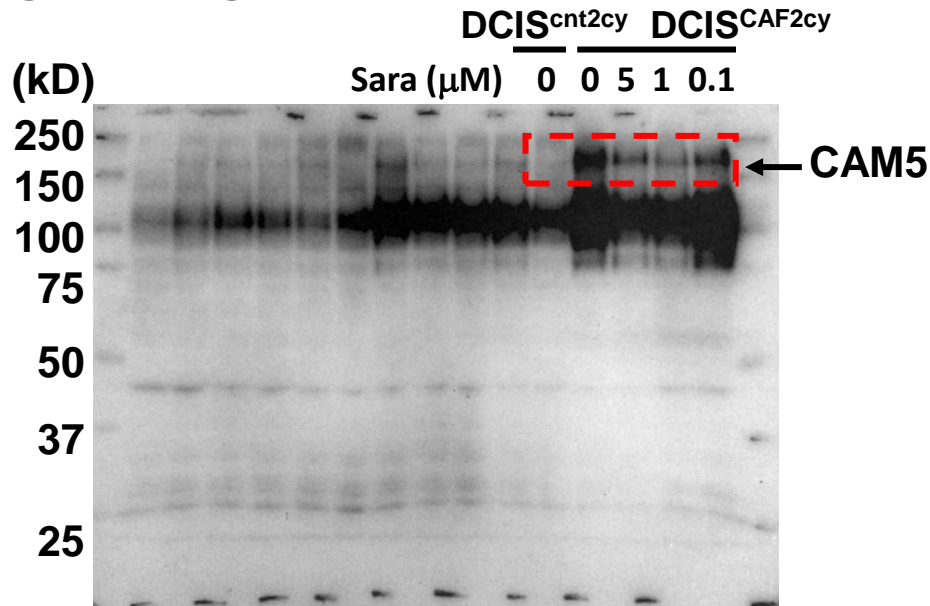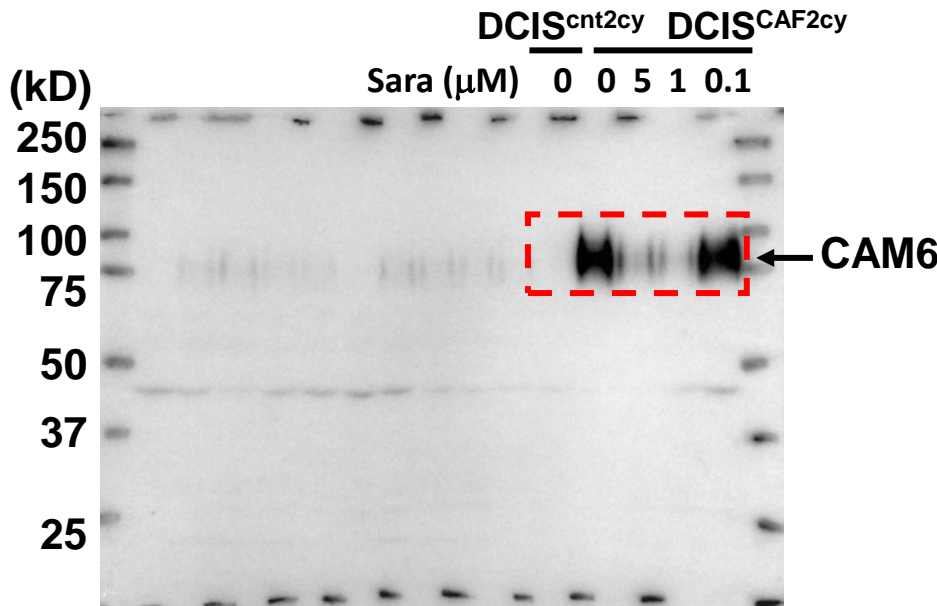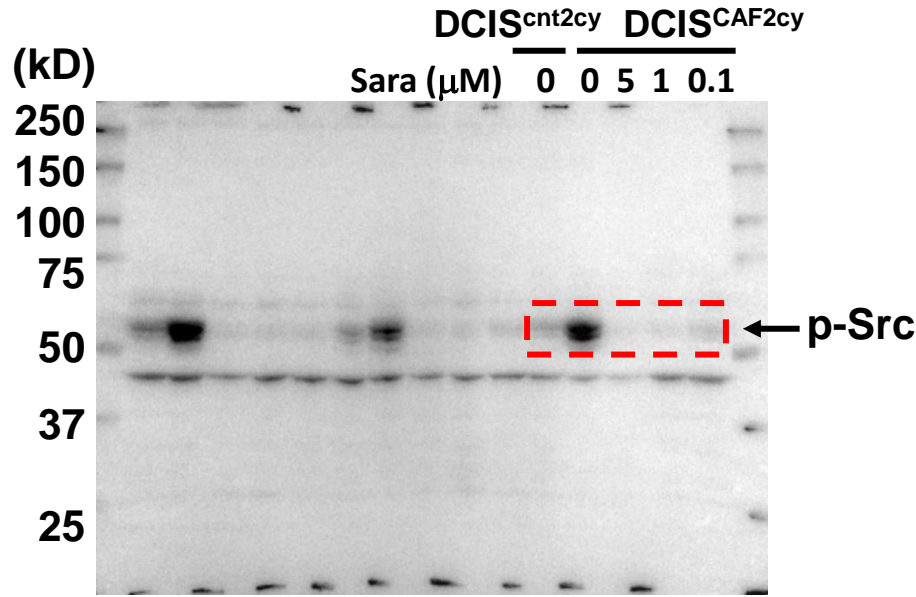

# Full unedited gel for Figure 6A

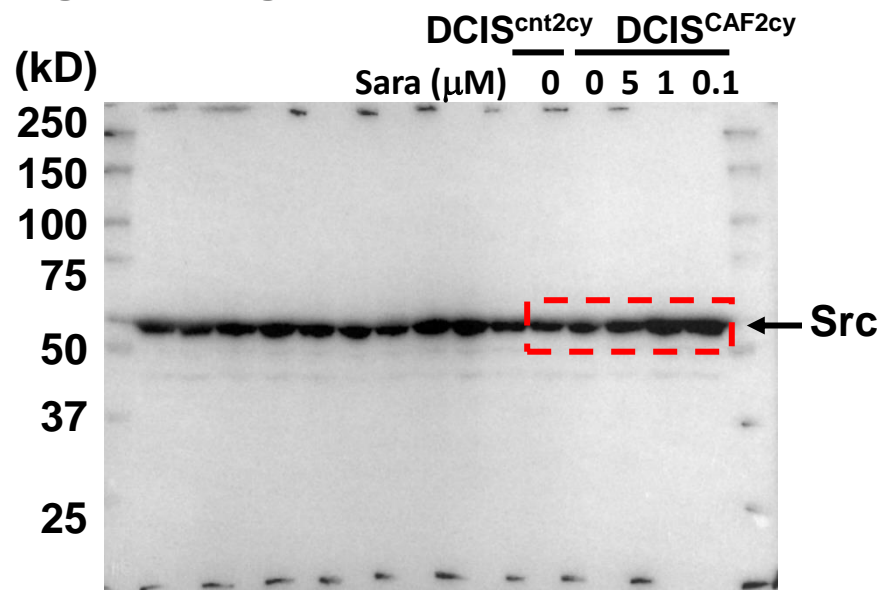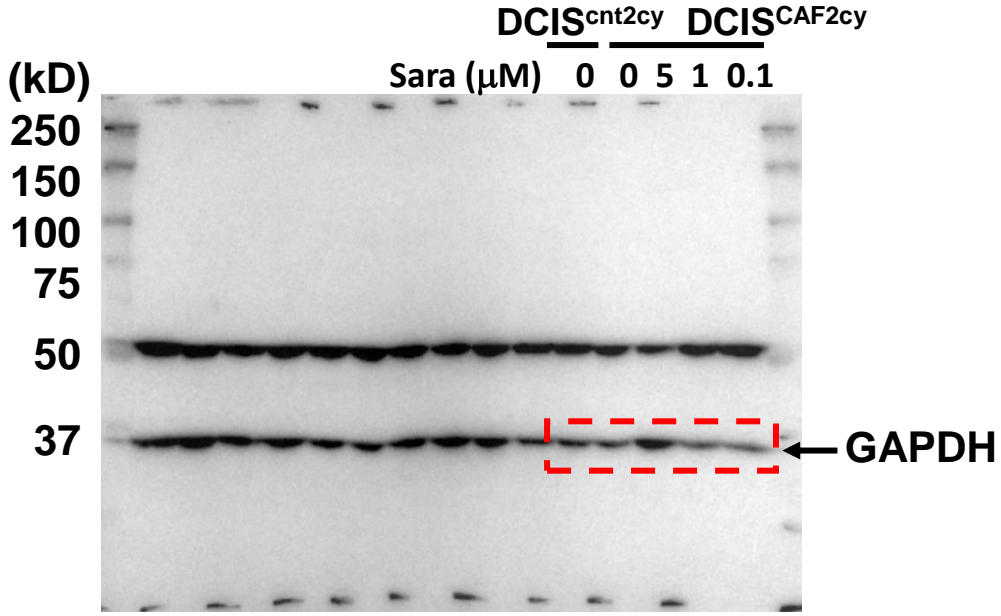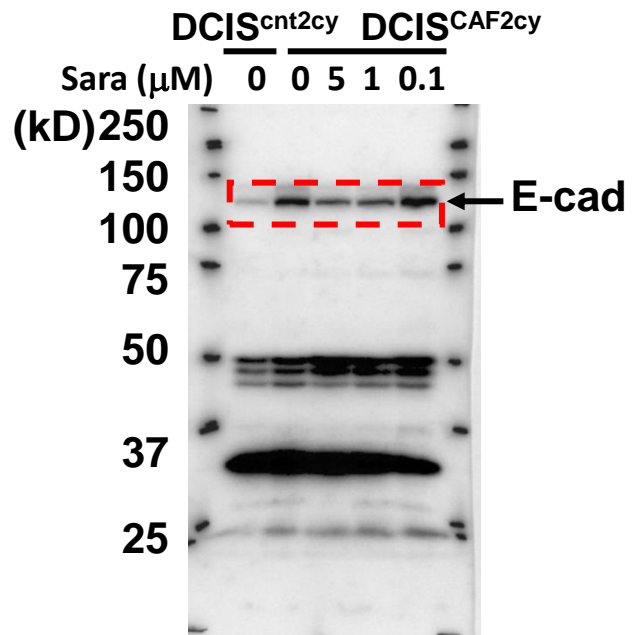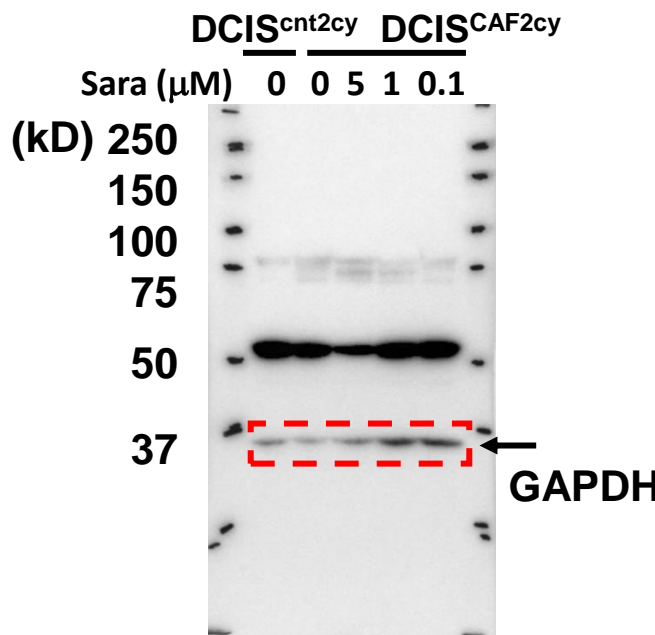



# Full unedited gel for Figure 6B

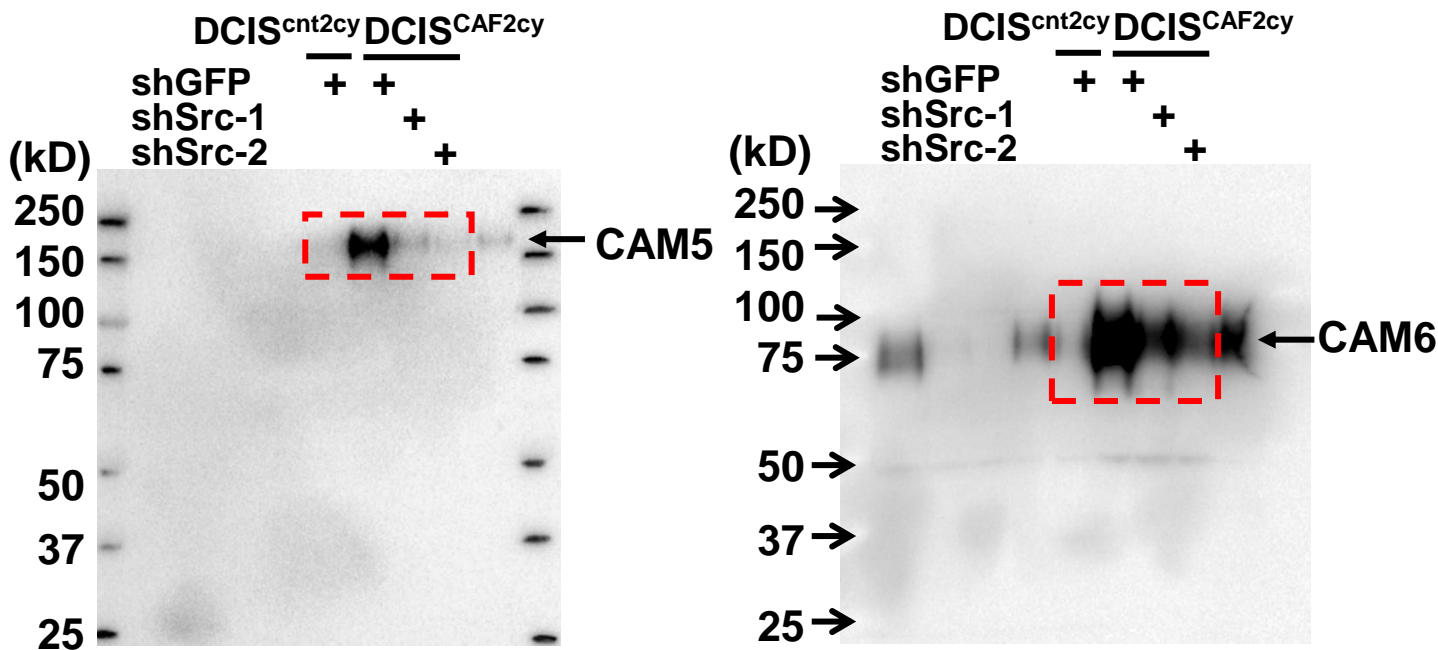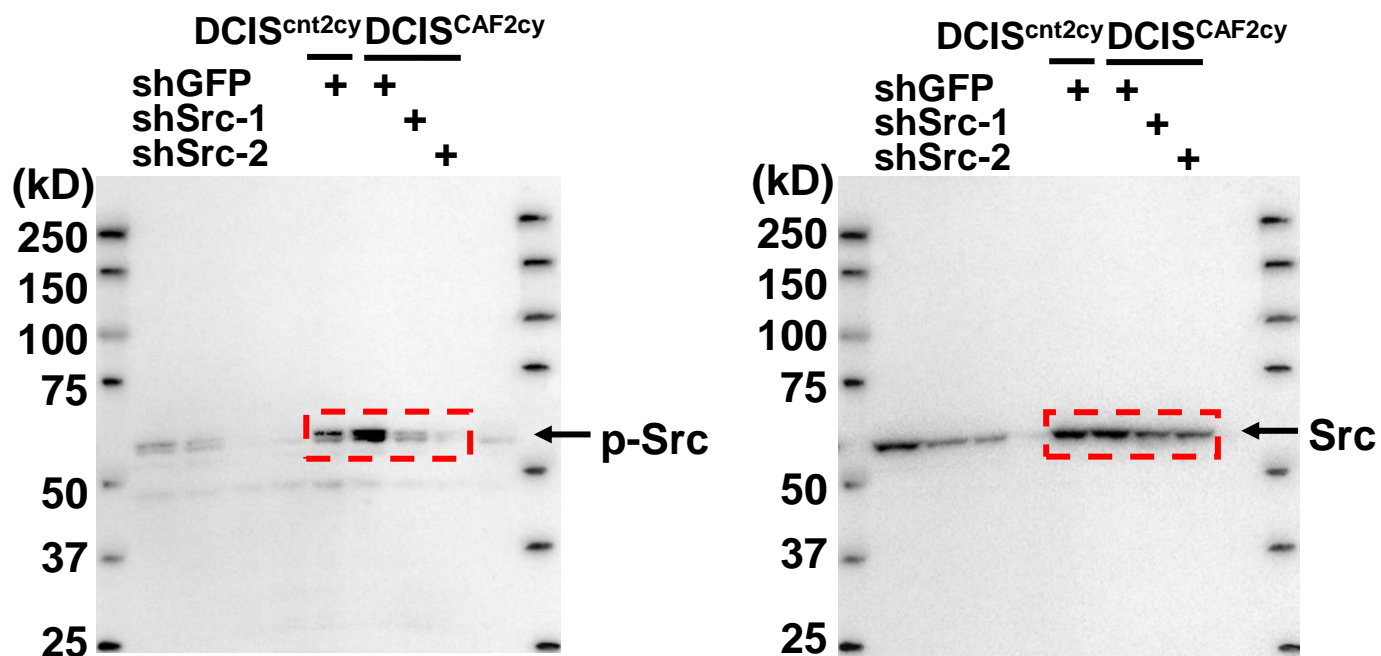

# Full unedited gel for Figure 6B

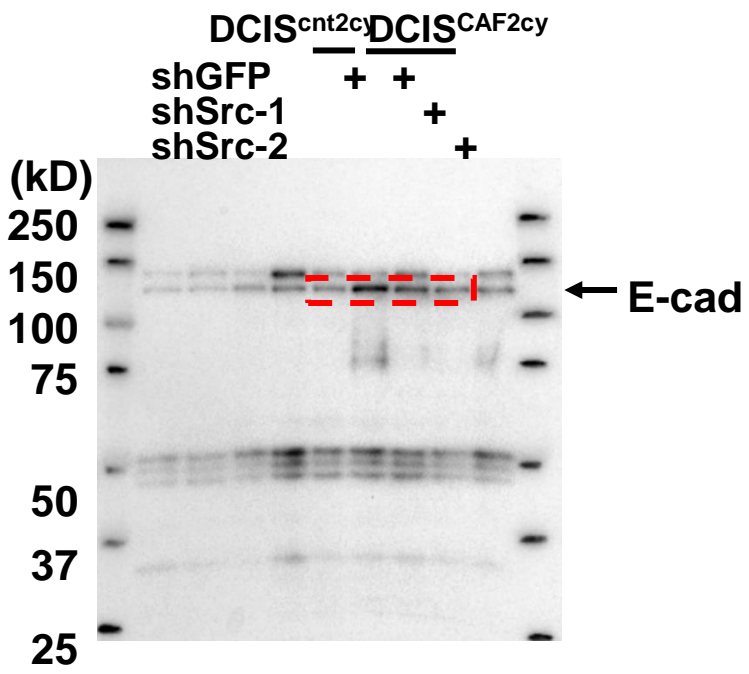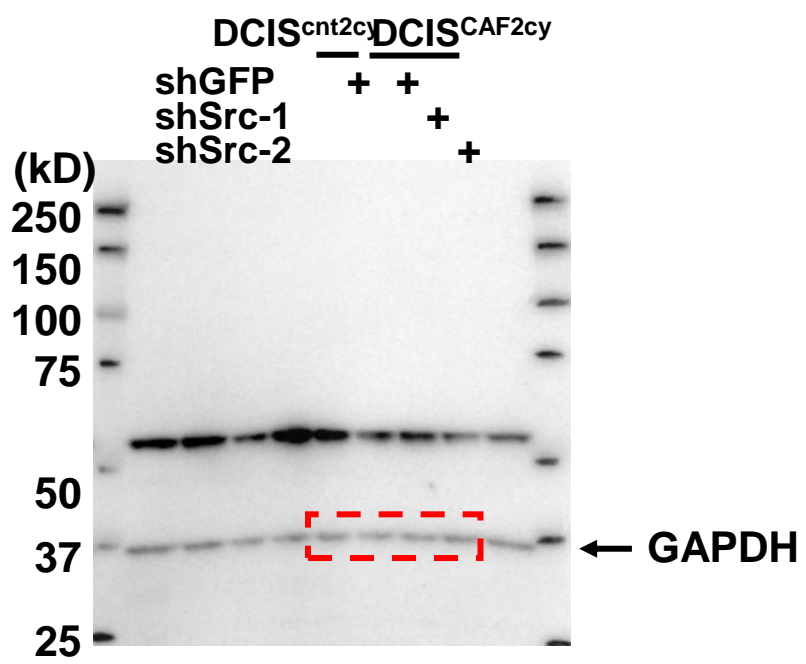

# Full unedited gel for Figure 6C (left)

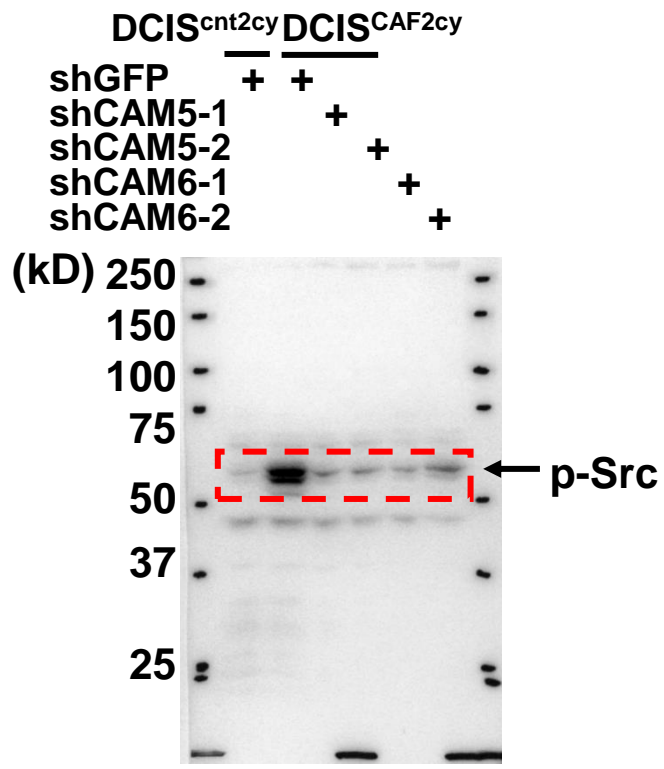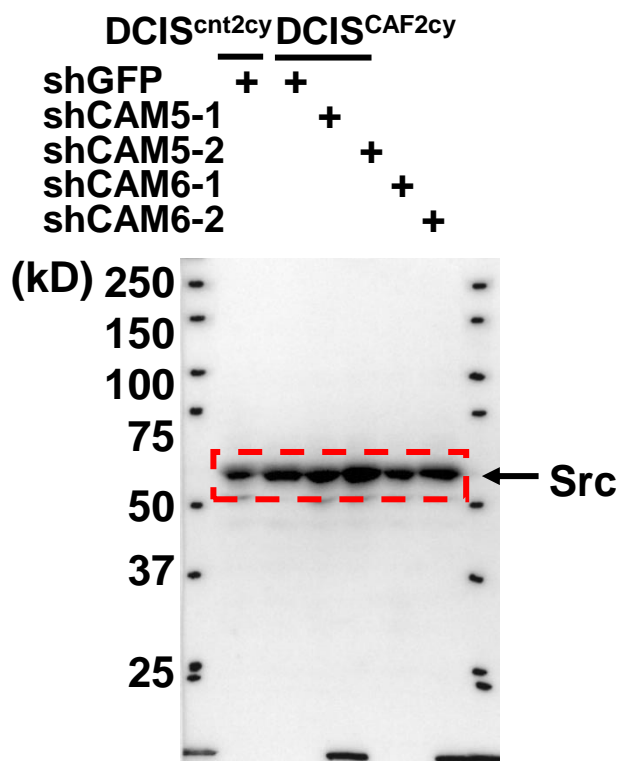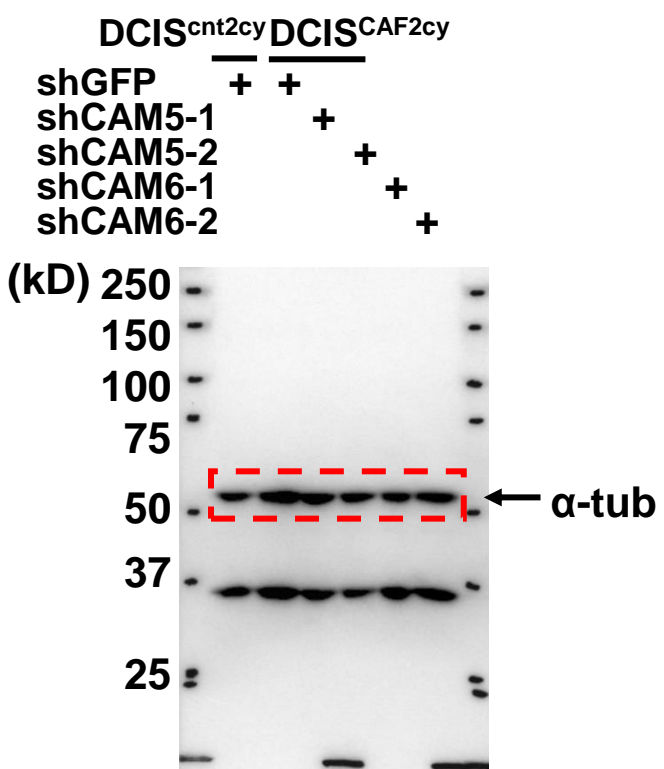

# Full unedited gel for Figure 6C (right)

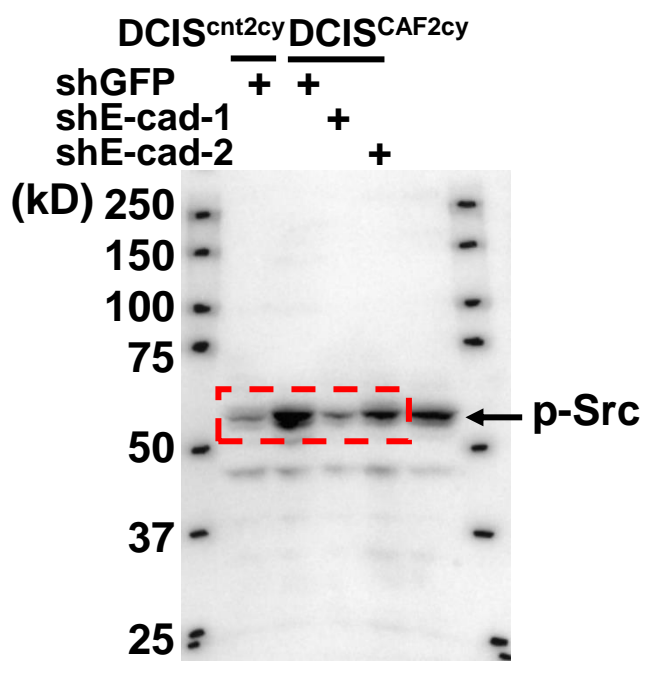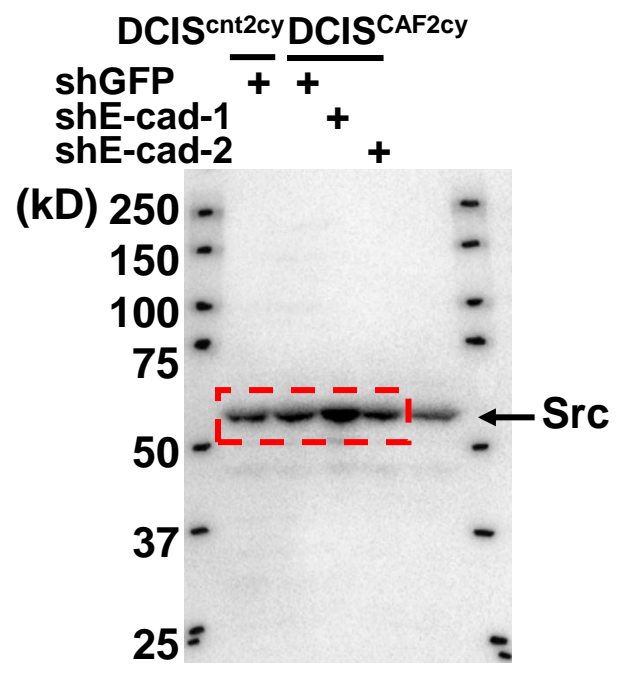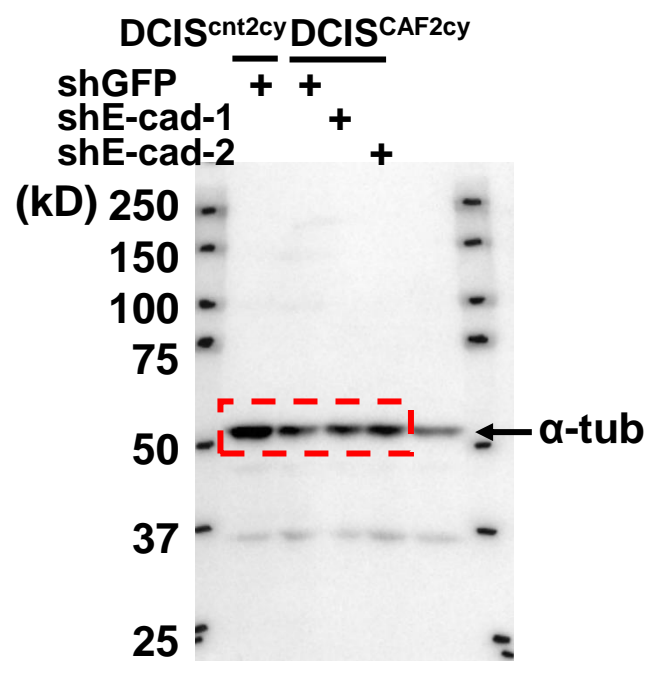

# Full unedited gel for Figure 6D

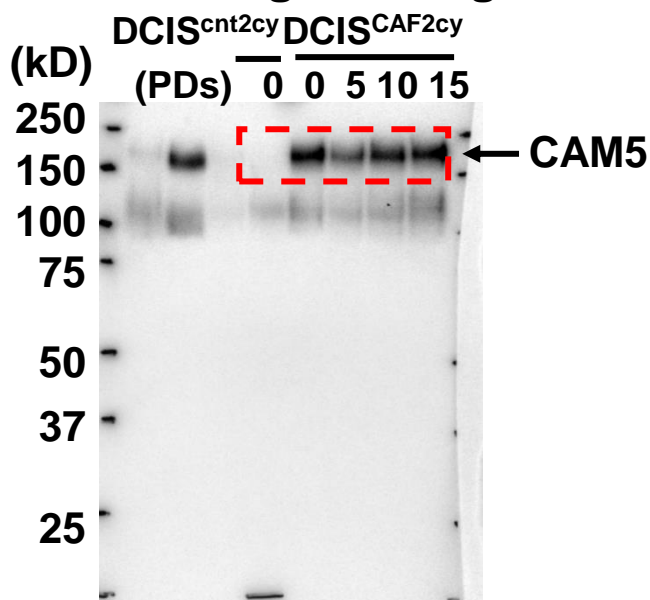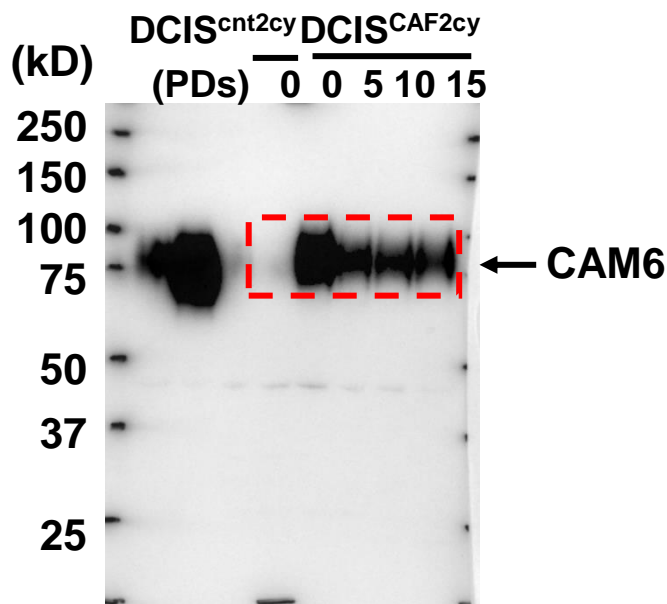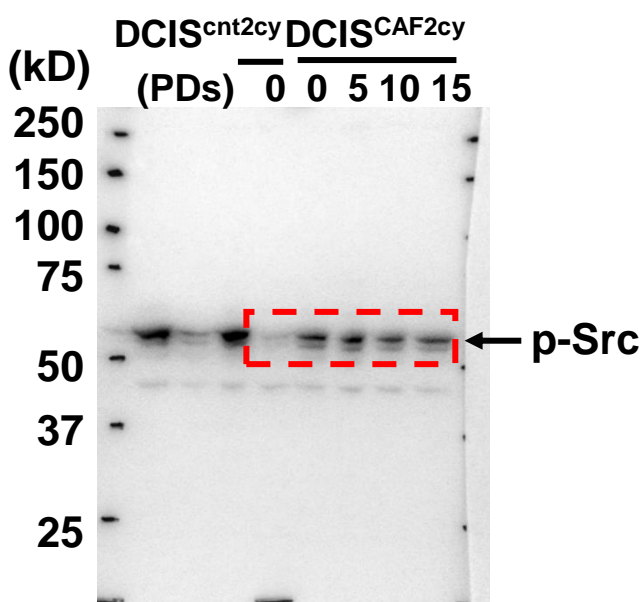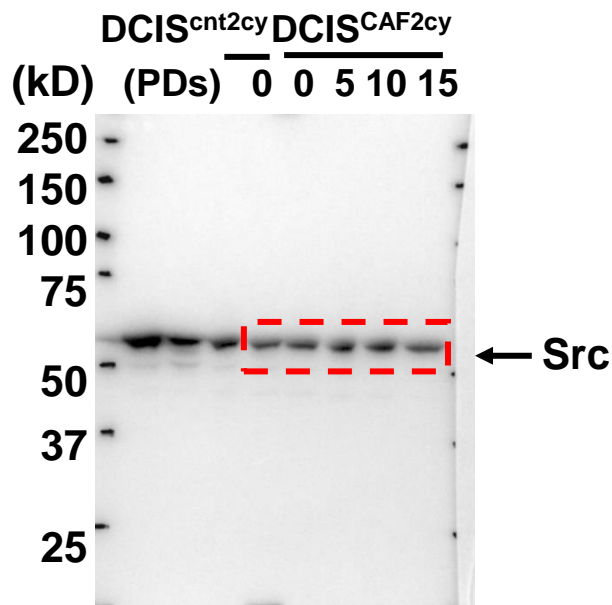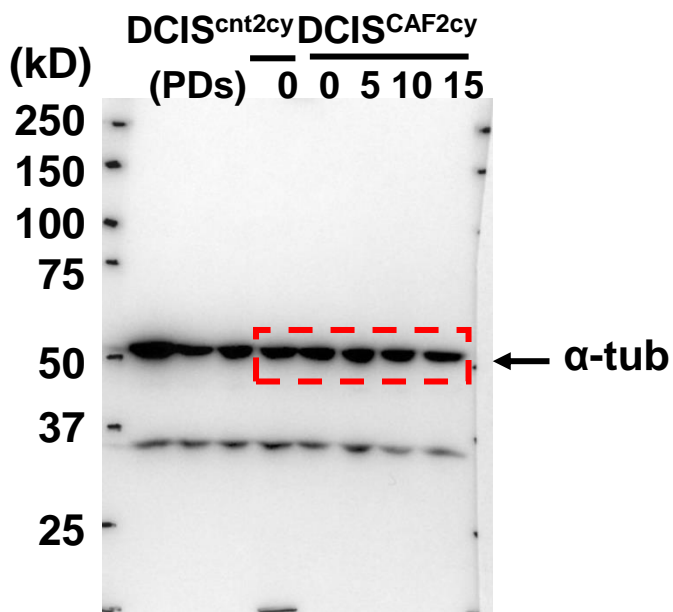

# Full unedited gel for Figure 6D

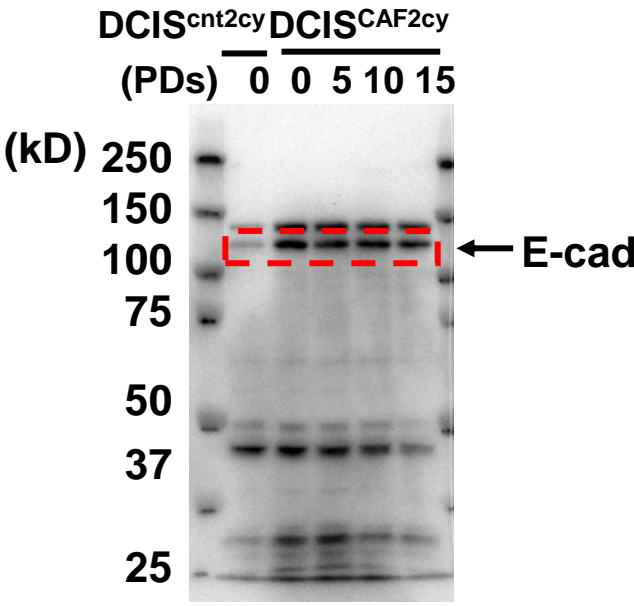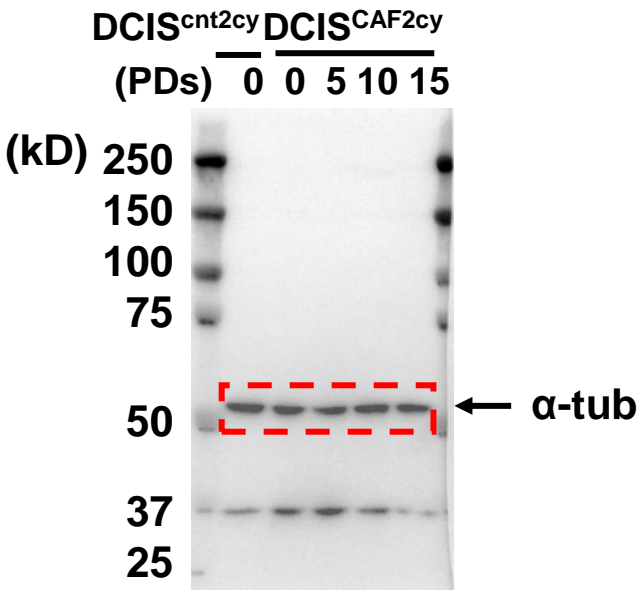

# Full unedited gel for Figure 7D

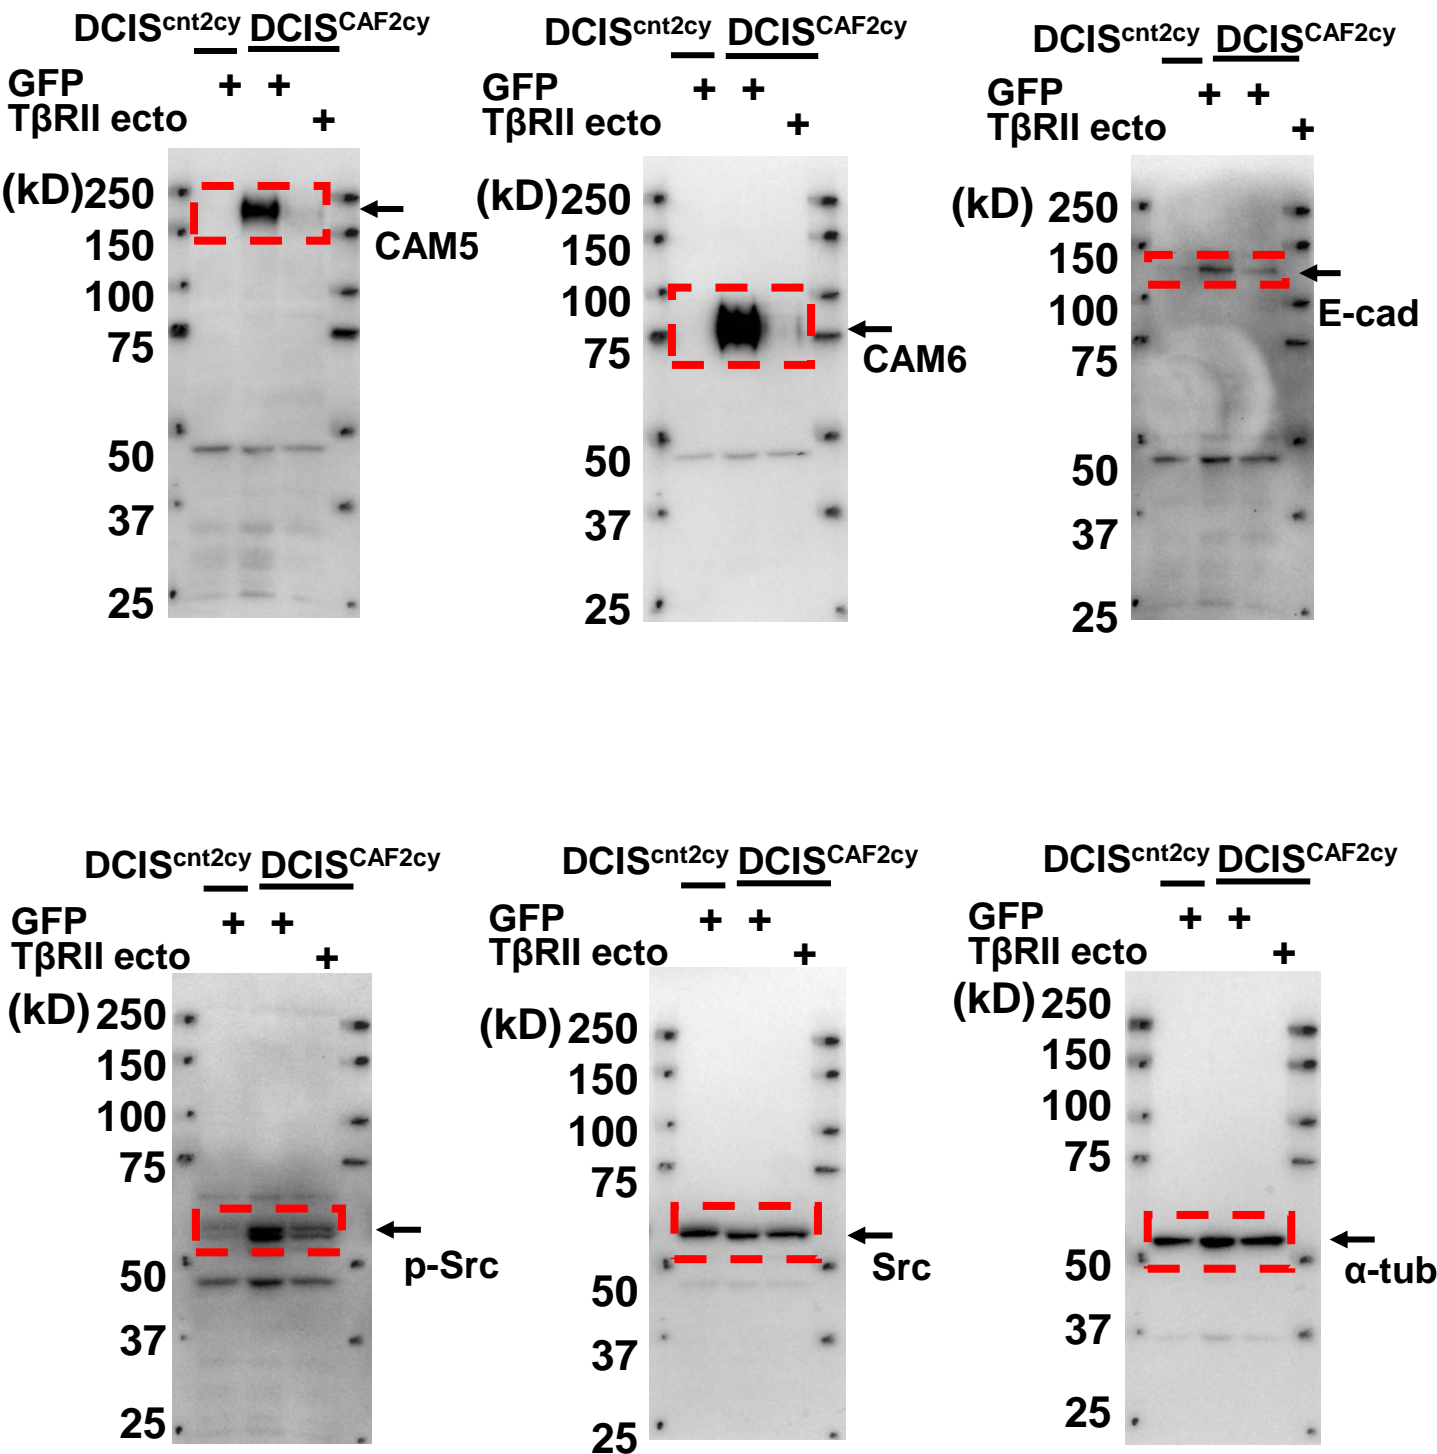

# Full unedited gel for Figure 7I

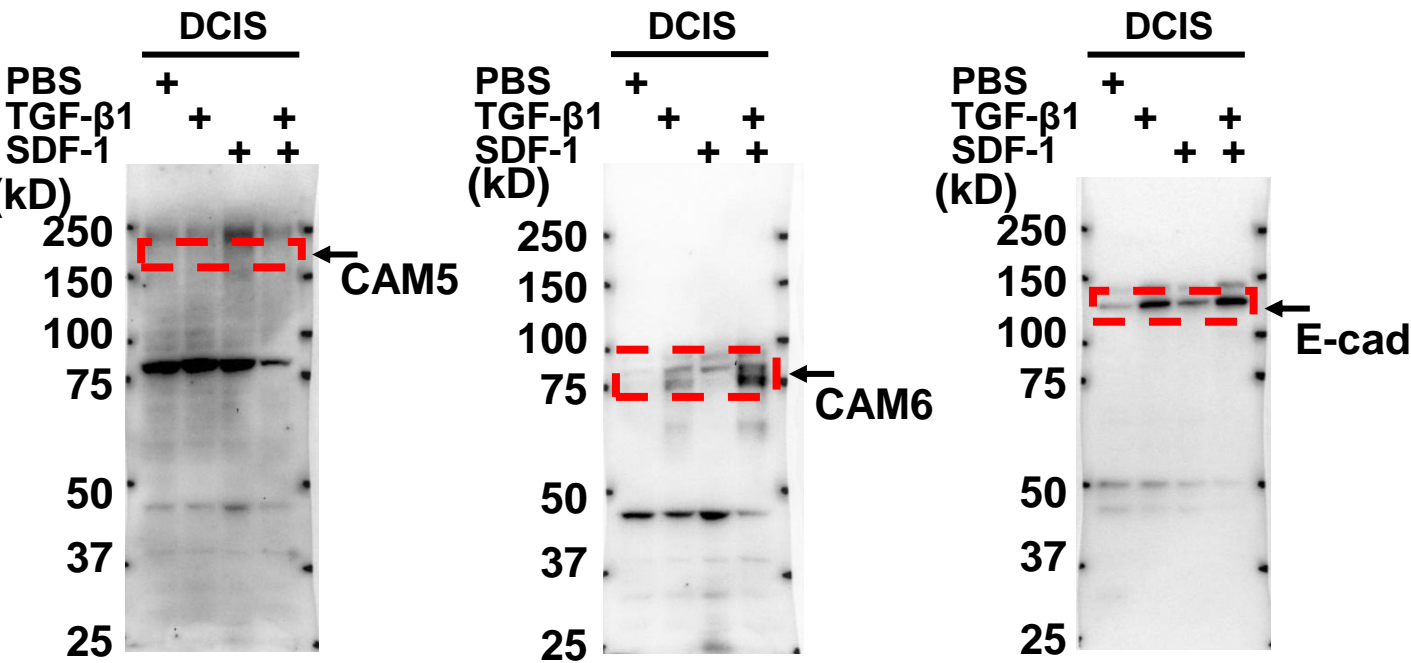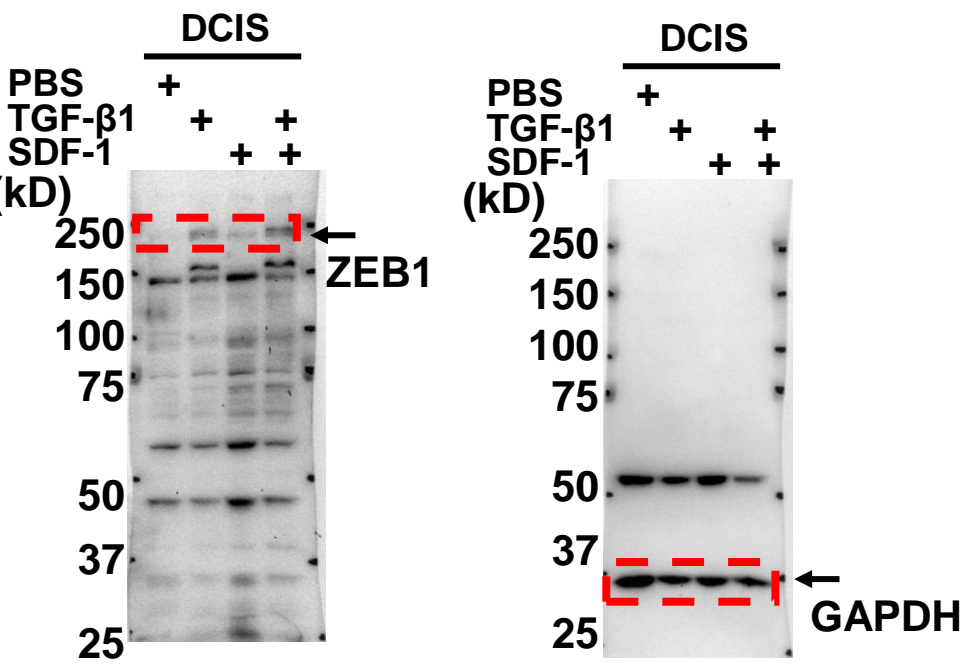



# Full unedited gel for Supplemental Figure 5I

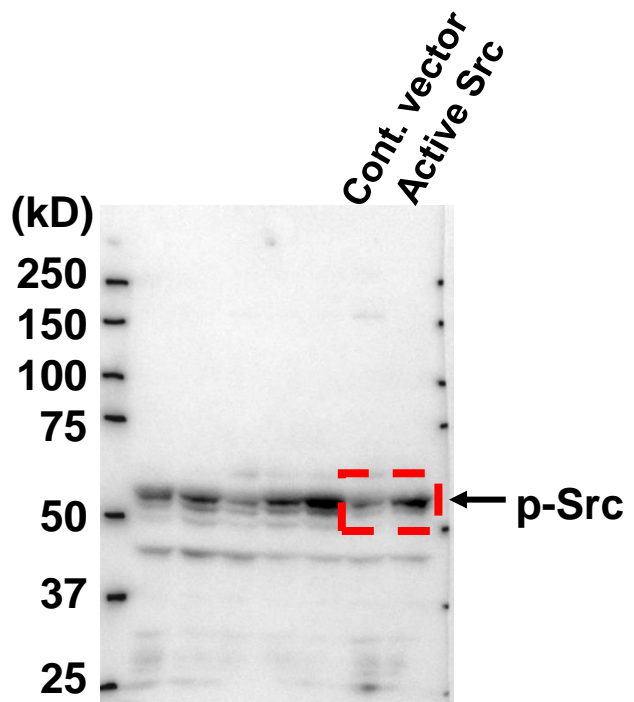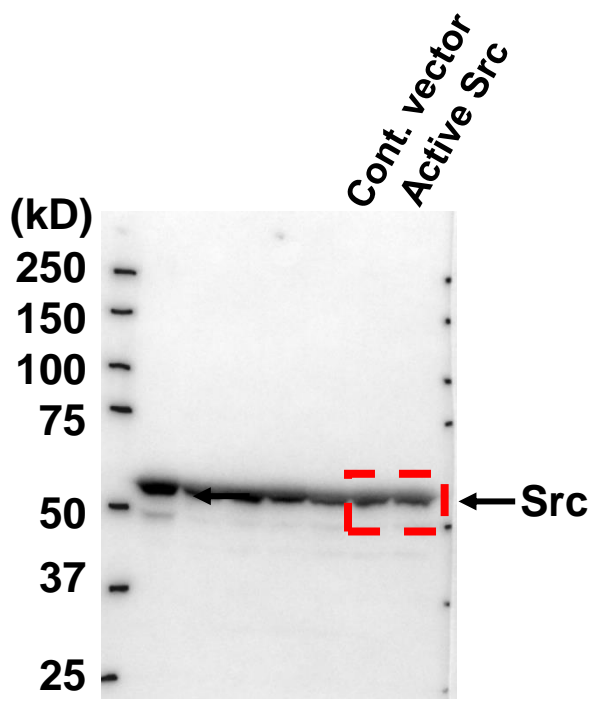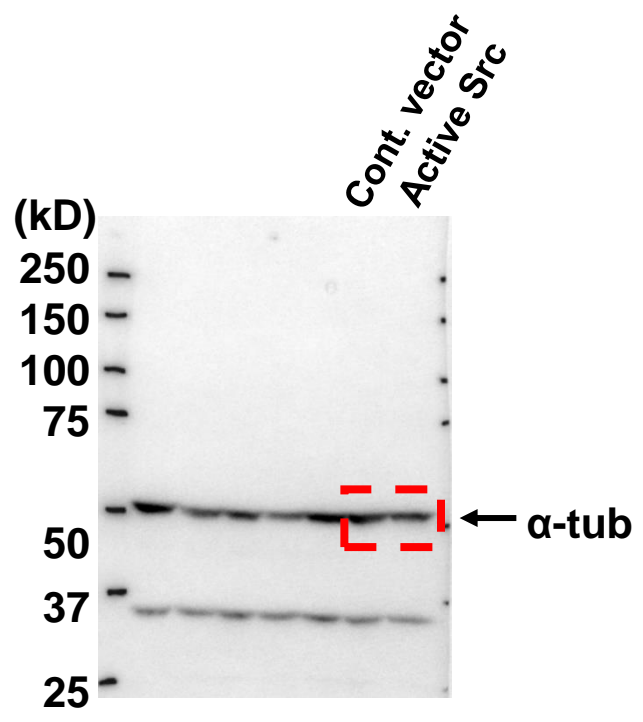

Supplement: inline-supplementary-material-30 [file inline-supplementary-material-30.pdf]
